# Pharmacokinetics of remdesivir in a COVID-19 patient with end-stage renal disease on intermittent hemodialysis

Fritz Sörgel <sup>1,2\*</sup>, Jakob J. Malin <sup>3-5\*</sup>, Henning Hagmann <sup>4,6</sup>, Martina Kinzig <sup>1</sup>, Muhammad Bilal <sup>7</sup>, Dennis A. Eichenauer <sup>8</sup>, Oliver Scherf-Clavel <sup>1,9</sup>, Alexander Simonis <sup>3,4</sup>, Lobna El Tabei <sup>7</sup>, Uwe Fuhr <sup>7#</sup>, Jan Rybníček <sup>3-5#</sup>

1 IBMP – Institute for Biomedical and Pharmaceutical Research, Paul-Ehrlich-Straße 19, D-90562 Nürnberg-Heroldsberg, Germany

2 Institute of Pharmacology, West German Heart and Vascular Centre, University of Duisburg-Essen, Essen, Germany

3 Department I of Internal Medicine, Division of Infectious Diseases, University of Cologne, Cologne, Germany

4 Faculty of Medicine, Center for Molecular Medicine Cologne (CMMC), University of Cologne, Cologne, Germany

5 German Center for Infection Research (DZIF), Partner Site Bonn-Cologne, Cologne, Germany

6 Department II of Internal Medicine, University Hospital Cologne, Cologne, Germany

7 Faculty of Medicine and University Hospital Cologne, Center for Pharmacology, Department I of Pharmacology, University of Cologne, Cologne, Germany

8 University of Cologne, Department I of Internal Medicine, Center for Integrated Oncology Aachen Bonn Cologne Dusseldorf, Intensive Care Program, Cologne, Germany.

9 University of Wuerzburg, Institute for Pharmacy and Food Chemistry, Wuerzburg, Germany

\* authors contributed equally

# corresponding authors:

Jan Rybníček, M.D., Ph.D.; ID-specialist  
Faculty of Medicine and University Hospital Cologne  
Department I of Internal Medicine; Division of Infectious Diseases  
University of Cologne, Cologne, Germany  
Email: jan.rybnik@uk-koeln.de

Uwe Fuhr, M.D.; Professor of Pharmacology  
Faculty of Medicine and University Hospital Cologne  
Center for Pharmacology  
Acting Director, Department I of Pharmacology  
University of Cologne, Cologne, Germany  
Email: uwe.fuhr@uk-koeln.de

## 1     **Abstract**

2     Remdesivir, a drug with provisional approval for the treatment of COVID-19, is not recommended in  
3     patients with an estimated glomerular filtration rate  $\leq 30$  mL/min. Here we provide a first detailed  
4     pharmacokinetic assessment of remdesivir and its major metabolites in a patient with end stage  
5     renal disease on hemodialysis.

## 6     **Introduction**

7     Remdesivir has been authorized for emergency use in patients with severe SARS-CoV-2 infection [1]  
8     as it reduced the median time to recovery from COVID-19 in a randomized controlled trial [2]. Due to  
9     a lack of data, remdesivir is not recommended for patients with an estimated glomerular filtration  
10    rate (eGFR)  $\leq 30$  mL/min, including those with end-stage renal disease (ESRD), which represents a  
11    substantial limitation for COVID-19 treatment in this vulnerable population. Patients with ESRD have  
12    an increased risk for a severe course of COVID-19 [3]. Moreover, COVID-19 itself leads to AKI and AKI-  
13    associated mortality in a significant proportion of critically ill patients [4]. Thus, it is of high  
14    importance to assess safety and pharmacokinetics of remdesivir in patients with renal impairment  
15    and those on renal replacement therapy [5].

16    Intracellular remdesivir prodrug (GS-5734) is rapidly converted to its alanine metabolite GS-704277  
17    and subsequently to the monophosphate that is finally converted to the active triphosphate GS-  
18    443902 [6]. Alternatively, dephosphorylation of the monophosphate yields the remdesivir nucleoside  
19    core (GS-441524) which becomes the predominant circulating metabolite providing a potential  
20    source of active drug by a slow re-phosphorylation process [7]. In healthy volunteers, renal excretion  
21    of a remdesivir dose is about 10% as unchanged drug [8] and about 50 % as GS-441524 [9].

22    Here we report on pharmacokinetics of remdesivir and its metabolites and treatment outcome in a  
23    patient on renal replacement therapy without residual renal function suffering from severe COVID-  
24    19.

25

## 26 **Methods**

### 27 **Administration of remdesivir**

28 Remdesivir was administered as controlled intravenous infusion (500 mL/h) over 30 minutes via  
29 femoral vein catheter without any parallel infusions (for doses and timing see figure 1). Markers for  
30 hepatotoxicity were monitored at least daily during treatment with remdesivir and for subsequent  
31 days (supplementary figure 2).

### 32 **Pharmacokinetic sampling**

33 Blood samples were drawn from the arterial line after discarding dead space volume. In addition,  
34 several blood samples were taken from the inlet and the outlet of the dialysis device to analyze drug  
35 elimination during hemodialysis. Polypropylene tubes containing 1.2 mg/mL  
36 ethylenediaminetetraacetic acid (EDTA) to prevent clotting and 1 mg/mL of sodium fluoride  
37 (Sarstedt, Nümbrecht, Germany) were used and directly placed on ice to prevent *in vitro* hydrolysis of  
38 remdesivir [10] and its metabolites before further processing within a maximum of one hour. Plasma  
39 was separated by centrifugation at 4°C and subsequently stored at -80°C prior to pharmacokinetic  
40 analyses.

### 41 **Hemodialysis**

42 Hemodialysis was performed using the Fresenius GENIUS® device, a single pass close tank  
43 hemodialysis system, containing 90 liters of dialysis fluid. The system was equipped with an FX600  
44 CorDiax® hemodialysis filter (Fresenius) and standard blood lines and tubing. The extracorporeal  
45 circuit was established via central venous catheter. Blood flow ranged between 150 and 280 mL/min.  
46 According to technical design, dialysate flow equaled blood flow. Ultrafiltration settings ranged  
47 between 100 and 200 ml/h. Hemodialysis was performed prior to administration of the daily  
48 remdesivir dose on days 2 and 5 of treatment. In the two dialysis sessions a blood volume of 88 and  
49 90 liters was processed. Duration of treatment was 425 minutes and 315 minutes. Ultrafiltration  
50 volume was 990 ml and 1037 ml, respectively. For anticoagulation unfractionated heparin was

administered as intravenous bolus of 2000 IE at the beginning of hemodialysis and a rate of 1000 IE/h during treatment.

### **Determination of remdesivir and metabolites**

Measurements of drug concentrations were performed at the Institute for Biomedical and Pharmaceutical Research, Nürnberg-Heroldsberg, Germany. Remdesivir and its metabolite GS-441524 were purchased from BIOSYNTH® Carbosynth (Berkshire, UK). Calibration standards and spiked quality control samples were prepared in drug-free human EDTA plasma. Liquid chromatography/mass spectrometry to detect the compounds used transitions REM 603.3→402.0 and 292.2→163.1 (GS-441524) on a SCIEX API 6500TM triple quadrupole mass spectrometer equipped with turbo ion spray interface (SCIEX, Concord, Ontario, Canada). Calibration for both compounds was performed by weighted ( $1/\text{concentration}^2$ ) linear regression. Linearity for remdesivir and GS-441524 in human plasma could be demonstrated over a calibration range from 3.600 to 787.4 ng/mL for remdesivir and from 10.84 to 474.5 ng/mL for GS-441524. Quantification of remdesivir and GS-441524 was performed by peak area ratio of analyte to internal standard (remdesivir: piperacillin-d5, GS-441524 amoxicillin-d4). When samples were outside that range a dilution by drug free human plasma was used. No interferences were observed for remdesivir and GS-441524 and the internal standards in human plasma. Since there was no reference standard available for the intermediate metabolite GS-704277, only the time course of plasma concentrations could be described which were obtained from peak heights relative to an internal standard (transition 443.1→202.1).

### **Pharmacokinetic assessment**

Pharmacokinetic parameters following the first dose for remdesivir and its metabolites were calculated by standard non-compartmental methods. Extraction of GS-441524 by dialysis was calculated as

75 (1-outlet concentration [corrected for volume loss] / inlet concentration). The observed decrease of

76 GS-441524 extraction during dialysis was described by linear regression with cumulative blood flow.

77

## 80 Results and Discussion

81 In September 2020, a male patient in his seventies was admitted to the Hospital and diagnosed with  
82 COVID-19 (Supplementary tables 1 and 2). Initially, he presented with typical pulmonary infiltrates  
83 and normal arterial blood gas results. However, clinical status deteriorated rapidly and  
84 dexamethasone treatment was initiated. At this time-point, remdesivir was not considered due to  
85 chronic renal impairment requiring renal replacement therapy. Sequential CT scans revealed  
86 progression of pulmonary infiltrates (Supplementary figure 1). Nine days after initial admission, the  
87 patient was transferred to the ICU with hypoxemic lung failure requiring high-flow oxygen therapy. In  
88 this critical situation, we decided to apply remdesivir while performing extensive therapeutic drug  
89 monitoring of the prodrug and two metabolites for safety reasons. Remdesivir concentrations  
90 decreased rapidly after the first infusion with an apparent half-life of 1.1 hours and were below the  
91 lower limit of quantification prior to dialysis (fig 1; supplementary tables 3 and 4). GS-441524  
92 concentrations increased up to 1 µg/mL and remained essentially constant. Exposure for remdesivir  
93 ( $AUC_{0-\infty}$  13.0 µg/mL\*h,  $C_{max}$  19.8 µg/mL) and GS-441524 ( $AUC_{0-20.1\ h}$  18.4 µg/mL\*h,  $C_{max}$  1.15 µg/mL)  
94 after the first dose was about 3-fold and 6-fold higher in our patient as compared to healthy  
95 volunteers (Supplementary tables 3 and 4) [8] which is in agreement with a preliminary observation  
96 in a critically ill patient with reduced renal function [11]. Both remdesivir clearance and volume of  
97 distribution were clearly lower in our patient, which may be attributable to his low body weight (53.2  
98 kg). Hemodialysis performed prior to the second and the 5<sup>th</sup> dose of remdesivir reduced GS-441524  
99 plasma concentrations by about 50% (fig. 1). The initial extraction rate of dialysis was 72% and  
100 decreased to 42% at the end of dialysis (Supplementary table 5). Trough concentrations of GS-  
101 441524 were high but stable between dialysis sessions (range 1.66 to 1.79 µg/mL), while remdesivir  
102 trough concentrations were always below the lower limit of quantification (fig. 1, supplementary  
tables 3 and 4). Thus, we did not observe significant accumulation of remdesivir and accumulation of  
GS-441524 was prevented by intermittent hemodialysis.

Accumulation of the vehicle sulfobutylether-beta-cyclodextrin (SBECD) may occur in renal failure [12] and high doses were associated with significant hepatic and renal toxicity in animals [13]. However, reported toxic doses were 50-100 times higher than exposure during a 5-10 day course of remdesivir. In addition, it was shown that SBECD is eliminated by renal replacement therapy [14, 15]. Although we did not measure SBECD concentrations in this study, clinically significant accumulation of SBECD seems unlikely given the limited treatment duration and intermittent hemodialysis.

Overall, there were no signs of drug related toxicity. Markers for hepatic injury remained within the reference ranges during treatment and up to 8 days of follow up (Supplementary figure 2). An isolated increase in International Normalized Ratio (INR) was observed, which improved after vitamin K supplementation and therefore was not considered as treatment related (Supplementary figure 2). By day 5 of remdesivir treatment, oxygenation parameters had improved allowing for patient transfer to a hospital ward.

Our observation support the safety of remdesivir in patients with ESRD on hemodialysis, which will assist clinical decision making and guide future clinical trial design.

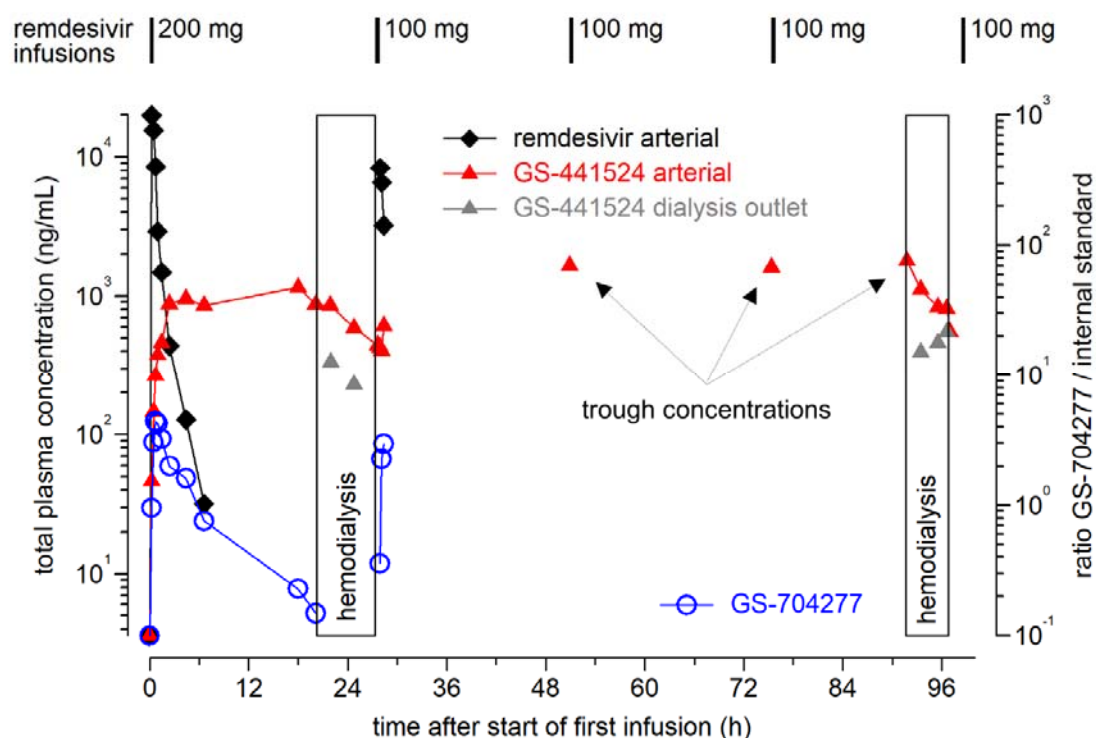

**Figure 1.** Pharmacokinetics of the prodrug remdesivir (GS-5734), its intermediate alanine metabolite (GS-704277) and the predominant circulating metabolite GS-441524 during a standard 5-day regimen in a patient with intermittent hemodialysis due to long lasting ESRD. Arterial blood samples were drawn in conjunction to initial administration of remdesivir and hemodialysis (d1, d4). In addition, GS-441524 concentrations in samples from dialysis outlet (gray triangles) are shown that were taken to assess elimination by hemodialysis.



126

## 127 **References**

- 128 1. European Medicines Agency (EMA). Press release on conditional authorization of Veklury  
129 (remdesivir). Available on: [www.ema.europa.eu/documents/press-release/ema-receives-](http://www.ema.europa.eu/documents/press-release/ema-receives-application-conditional-authorisation-first-covid-19-treatment-eu_en.pdf)  
130 [application-conditional-authorisation-first-covid-19-treatment-eu\\_en.pdf](http://www.ema.europa.eu/documents/press-release/ema-receives-application-conditional-authorisation-first-covid-19-treatment-eu_en.pdf) (Accessed 1st  
131 October 2020).
- 132 2. Beigel JH, Tomashek KM, Dodd LE, et al. Remdesivir for the Treatment of Covid-19 - Final  
133 Report. N Engl J Med 2020: NEJMoa2007764. DOI: 10.1056/NEJMoa2007764.
- 134 3. Ng JH, Hirsch JS, Wanchoo R, et al. Outcomes of patients with end-stage kidney disease  
135 hospitalized with COVID-19. Kidney Int 2020: S0085-2538(20)30945-5. DOI:  
136 10.1016/j.kint.2020.07.030.
- 137 4. Chan L, Chaudhary K, Saha A, et al. AKI in Hospitalized Patients with COVID-19. Journal of the  
138 American Society of Nephrology 2020: ASN.2020050615. DOI: 10.1681/ASN.2020050615.
- 139 5. Adamsick ML, Gandhi RG, Bidell MR, et al. Remdesivir in Patients with Acute or Chronic  
140 Kidney Disease and COVID-19. J Am Soc Nephrol **2020**; 31(7): 1384-6.
- 141 6. Malin JJ, Suárez I, Priesner V, Fätkenheuer G, Rybníček J. Remdesivir against COVID-19 and  
142 Other Viral Diseases. Clinical Microbiology Reviews **2020**; 34(1): e00162-20. DOI:  
143 10.1016/S2213-2600(20)30079-5.
- 144 7. Eastman RT, Roth JS, Brimacombe KR, et al. Remdesivir: A Review of Its Discovery and  
145 Development Leading to Emergency Use Authorization for Treatment of COVID-19. ACS Cent  
146 Sci **2020**; 6(5): 672-83.
- 147 8. Humeniuk R, Mathias A, Cao H, et al. Safety, Tolerability, and Pharmacokinetics of  
148 Remdesivir, An Antiviral for Treatment of COVID-19, in Healthy Subjects. Clin Transl Sci **2020**;  
149 13(5): 896-906.
- 150 9. Food and Drug Administration (FDA). FACT SHEET FOR HEALTH CARE PROVIDERS  
151 EMERGENCY USE AUTHORIZATION (EUA) OF VEKLURY® (remdesivir). 2020. Available on:  
152 [www.fda.gov/media/137566/download](http://www.fda.gov/media/137566/download) (accessed: 1st October 2020).
- 153 10. Scherf-Clavel O, Kaczmarek E, Kinzig M, et al. Tissue level profile of SARS-CoV-2 antivirals in  
154 mice to predict their effects in COVID-19 multiorgan failure. bioRxiv 2020:  
155 2020.09.16.299537. DOI: 10.1101/2020.09.16.299537.

156 11. Tempestilli M, Caputi P, Avataneo V, et al. Pharmacokinetics of remdesivir and GS-441524 in  
157 two critically ill patients who recovered from COVID-19. *J Antimicrob Chemother* **2020**;  
158 75(10): 2977-80.

159 12. Hoover RK, Alcorn H, Jr., Lawrence L, et al. Clinical Pharmacokinetics of Sulfobutylether- $\beta$ -  
160 Cyclodextrin in Patients With Varying Degrees of Renal Impairment. *J Clin Pharmacol* **2018**;  
161 58(6): 814-22.

162 13. Luke DR, Tomaszewski K, Damle B, Schlamm HT. Review of the basic and clinical  
163 pharmacology of sulfobutylether-beta-cyclodextrin (SBECD). *J Pharm Sci* **2010**; 99(8): 3291-  
164 301.

165 14. Luke DR, Wood ND, Tomaszewski KE, Damle B. Pharmacokinetics of sulfobutylether- $\beta$ -  
166 cyclodextrin (SBECD) in subjects on hemodialysis. *Nephrol Dial Transplant* **2012**; 27(3): 1207-  
167 12.

168 15. Kiser TH, Fish DN, Aquilante CL, et al. Evaluation of sulfobutylether- $\beta$ -cyclodextrin (SBECD)  
169 accumulation and voriconazole pharmacokinetics in critically ill patients undergoing  
170 continuous renal replacement therapy. *Crit Care* **2015**; 19(1): 32.

171
